# Supplementary material for: Involvement of Heparanase in the Pathogenesis of Acute Pancreatitis: Implication of Novel Therapeutic Approaches
Source: Preprints.org preprint supplement (doi:10.20944/preprints202310.0026.v1), 2023-10-02
Supplement: Supplementary file 1 [file supplementary]

# Involvement of Heparanase in the Pathogenesis of Acute Pancreatitis: Implication of novel Therapeutic Approaches

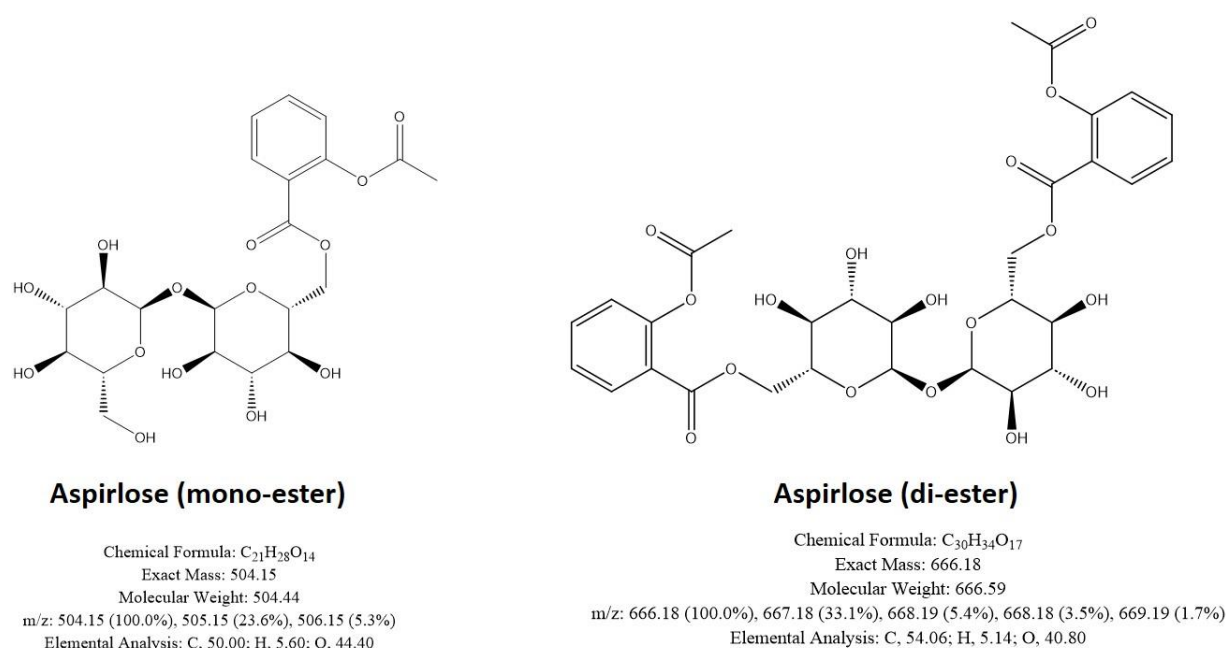

**Figure S1.** Chemical structure of Aspirlose as mono-ester and dimer-ester forms.
